# Supplementary material
Source: PubMed Central journal article supplement (PMC3837747)
Supplement: AEM.02322-13_zam999104885so1.pdf [file AEM.02322-13_zam999104885so1.pdf]

**Overexpression of *fetA* (*ybbL*) and *fetB* (*ybbM*), encoding an iron exporter, enhances resistance to oxidative stress in *Escherichia coli***

Sergios A. Nicolaou, Alan G. Fast, Eiko Nakamaru-Ogiso, and Eleftherios T. Papoutsakis

**Supplemental Information**

**Table S1.** Plasmids isolated for the H<sub>2</sub>O<sub>2</sub> tolerant clones.

| Strain | Plasmid Library | Genomic Region/ Size *         | Genes in plasmid **                                                                      |
|--------|-----------------|--------------------------------|------------------------------------------------------------------------------------------|
| 1      | 2MgL            | 1552,357 - 1,555,984 (3,627)   | ( <i>maeA</i> ), <i>sra</i> , <i>bdm</i> , <i>osmC</i> , ( <i>ddpF</i> )                 |
|        | 4MgL            | 4,032,316 - 4,029,152 (-3,164) | <i>pepO</i> , <i>yigZ</i> , ( <i>trkH</i> )                                              |
| 2      | 2MgL            | 4,412,412 - 4,414,354 (1,942)  | ( <i>aidB</i> ), <i>yjfN</i>                                                             |
|        | 4MgL            | 127,628 - 124,611 (-3,017)     | ( <i>aceE</i> ), <i>aceF</i>                                                             |
| 3      | 2MgL            | 513,453 - 517,242 (3,789)      | ( <i>cueR</i> ), <i>ybbJ</i> , <i>qmcA</i> , <i>ybbL</i> , <i>ybbM</i> , ( <i>ybbN</i> ) |
|        | 4MgL            | 769,180 - 765,615 (-3,565)     | ( <i>mngA</i> ), ( <i>mngB</i> )                                                         |
| 4      | 2MgL            | 517,376 - 513,076 (-4,300)     | <i>cueR</i> , <i>ybbJ</i> , <i>qmcA</i> , <i>ybbL</i> , <i>ybbM</i> , ( <i>ybbN</i> )    |
|        | 4MgL            | 366,152 - 369,903 (3,751)      | ( <i>lacI</i> ), <i>mhpR</i> , <i>mhpA</i> , ( <i>mhpB</i> )                             |
| 5      | 2MgL            | 517,376 - 513,076 (-4,300)     | <i>cueR</i> , <i>ybbJ</i> , <i>qmcA</i> , <i>ybbL</i> , <i>ybbM</i> , ( <i>ybbN</i> )    |
|        | 4MgL            | 362,352 - 367,016 (4,664)      | <i>lacZ</i> , <i>lacI</i> , ( <i>mhpR</i> )                                              |
| 6      | 2MgL            | 517,376 - 513,076 (-4,300)     | <i>cueR</i> , <i>ybbJ</i> , <i>qmcA</i> , <i>ybbL</i> , <i>ybbM</i> , ( <i>ybbN</i> )    |
|        | 4MgL            | 2,820,268 - 2,823,783 (3,515)  | <i>recA</i> , <i>ygaD</i> , <i>mltB</i>                                                  |

\* A negative sign indicates that the fragment is included in the opposite orientation

\*\* Genes included are in parenthesis are incomplete genes on the isolated plasmids

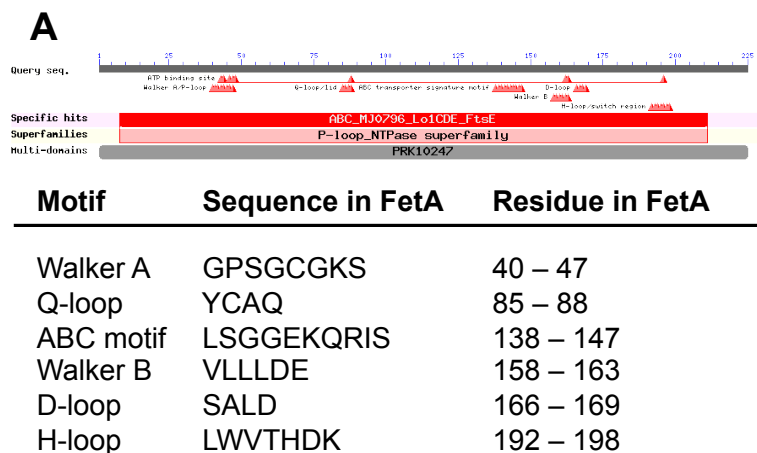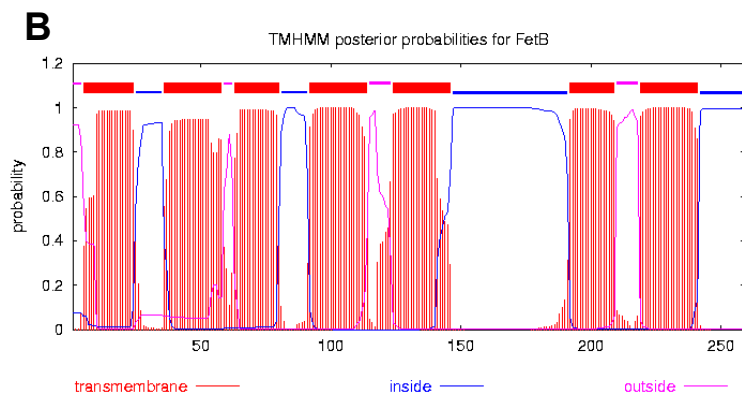

**Fig. S1. Bioinformatic analysis of FetA and FetB.** (A) pBLAST of FetA reveals specific hits for ABC transporters and the P-loop-NTPase superfamily (1). The conserved domains in FetA were predicted using the NCBI Conserved Domain Database (6). (B) The transmembrane domains for FetB and their internal localization were predicted using the TMHMM v. 2.0 server (4).

```

ALS3      MDLKWDDFFN-----DYEWLIVFLKGMVKPAAALVVVLLAVILSYSONLSLEG 48
Star2     MMASMAALLQRLLVVVNQVDPGAPGFWREFLVGMLKPVAATAVVAMAVALSFTQRLGLEG 60
FetB      -----MNSHNITNESLALALMLVVVAILISHKEKLALEK 34
          . . . * :* :* :*...*.**

ALS3      EMIYSVSRSFQLQSVIGFVLQFIFNQENSGWIIILAYLFMVSVAGYTAGQRRARHVPRGKYV 108
Star2     EMLYAMARAFQLQSVIGFVLQFIFTQKSAAWILLAYLFMVTVAGYTAGQRRARHVPRGKHI 120
FetB      DILWSVGRAIIQLIIVGYVLKYIFSVDDASLTLMLVLFICFNAAWNAQKRKSKYIAKAFIS 94
          :::::.*:::** ::*:**::** . . . . :* **: *...* *:::.....

ALS3      AGLSILAGTSITMFLLVLLNVFPFTPRYMIPIAGMLVGNAMTVTGMTKQLRDDIKMQLN 168
Star2     AAVSILAGTSVTMALLVALRVFPFTPRYIIPVAGMMVGNAMTVTGMTKKLREDVGMQRG 180
FetB      SFIAITVGAGITLAVLILSGSIEFIPMQVIPIAGMIAGNAMVAVGLCYNNLGQRVISEQQ 154
          : ::* .*:::*: ::* : * * :**:*:*..*****..*: ::* : : :

ALS3      LVETALALGATPRQATLQOVKRALVISLSPVLDCKTVGLISLPGAMTGMIMGGASPLEA 228
Star2     VVETALALGATPRQATARQVRRSLVIALSPVIDNAKTVGLIALPGAMTGLIMGGASPLEA 240
FetB      QIQEKLSLGATPKQASAILIRDSIRAALIPTVDSAKTVGLVSLPGMMSGLIFAGIDPVKA 214
          ::* :*****::* : : : * *..*****:*** *:*:*.* .*::*

ALS3      IQLQIVVMNMMVGAATVSSITSTYLCWPSFFTKAYQLQTHVFSSD 273
Star2     IQLQIVVMNMLMGASTVSSILSTYLCWPAFFTGAFQLNDAVFAAD 285
FetB      IKYQIMVTFMLLSTASLSTIIACYLTYRKFYNSRHQLVVTQLKKK 259
          *: **:* *:::~::~* : ** : *.. .** : .

```

**Fig. S2. Protein homology between FetB, ALS3 and Star2.** The sequence alignment of FetB, ALS3 and Star2. Sequence alignment was performed using ClustalW (2, 5). The consensus symbols are represented as generated by ClustalW (\* indicates a fully conserved residue, : indicates residues with strongly similar properties, and . indicates conservation of residues with weakly similar properties).

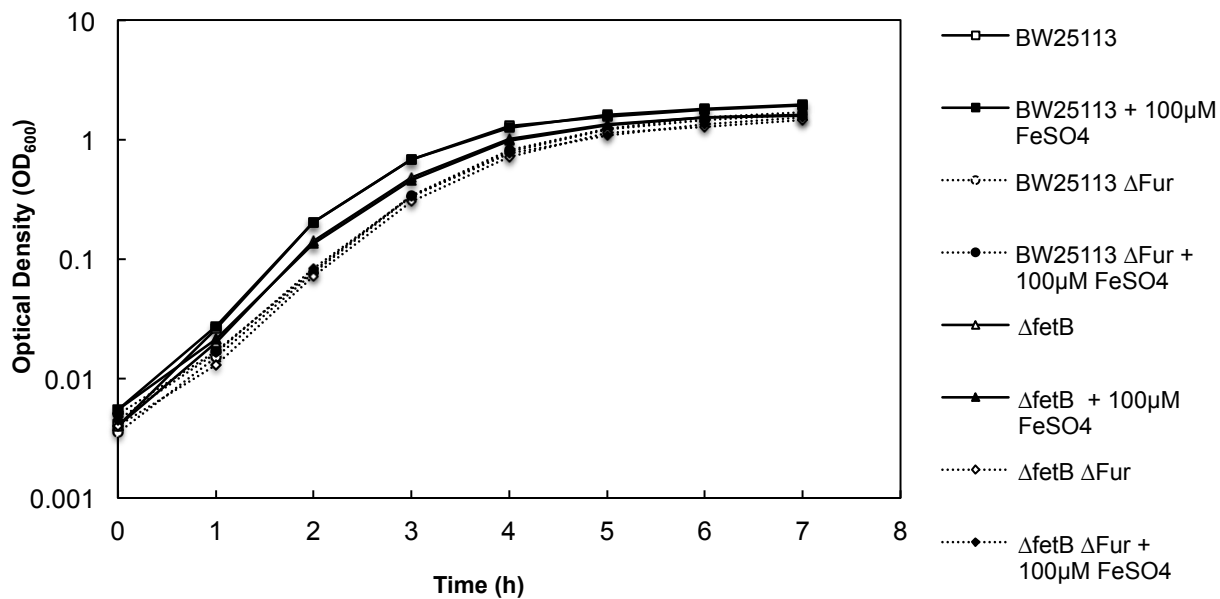

**Fig. S3. Growth of *E. coli* BW25113 strains in LB media with 100  $\mu$ M FeSO<sub>4</sub>.** Overnight cultures grown in LB were diluted 100-fold in fresh LB medium and grown for 2 hours to early exponential phase. The cultures were then diluted 100-fold into 20 ml fresh LB containing 100  $\mu$ M FeSO<sub>4</sub> (filled markers) or no additives (empty markers) and growth was monitored spectrophotometrically. Dashed lines represent the  $\Delta fur$  strains. The strains are marked as follows: WT BW25113 squares, BW25113  $\Delta fur$  circles, BW25113  $\Delta fetB$  triangles, BW25113  $\Delta fetB \Delta fur$  diamonds. Experiments were performed in duplicate and the average is shown.

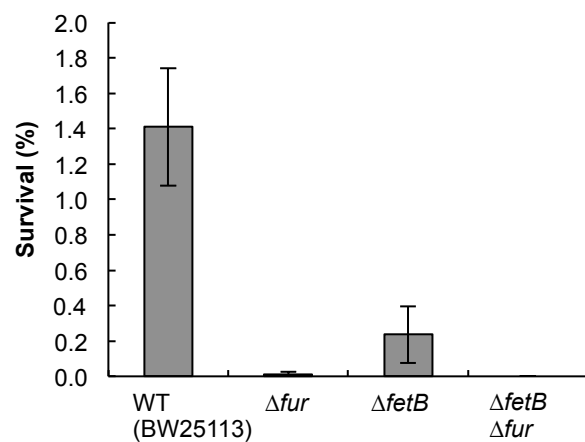

**Fig. S4. Survival of the WT BW25113, BW25113  $\Delta fur$ , BW25113  $\Delta fetB$ , and the BW25113  $\Delta fetB \Delta fur$  strains after 30 min 4 mM  $H_2O_2$  stress in LB supplemented with 30  $\mu M$   $FeSO_4$ .** The  $\Delta fur$  knockouts exhibit increased sensitivity to  $H_2O_2$  stress when supplemented with iron. The survival rate of the BW25113  $\Delta fur \Delta fetB$  strains could not be determined as it was below the resolution of the plating assay. Data are means  $\pm$  SEM ( $n = 3$ ).

### ***Investigating the protective role of manganese against oxidative stress by H<sub>2</sub>O<sub>2</sub>***

The role of manganese in H<sub>2</sub>O<sub>2</sub> stress was investigated by culturing the BW25113,  $\Delta fetA$  and  $\Delta fetB$  with the pCntl and pF3 (*fetA-fetB*) overexpression plasmids in minimal media supplemented with 30  $\mu$ M MnCl<sub>2</sub>. Manganese provided a protective effect to all strains, as evidenced in Fig. S5 A and B (compared to Fig. 3A & B). The  $\Delta fetA$  and  $\Delta fetB$  strains have higher tolerance to H<sub>2</sub>O<sub>2</sub> stress when supplemented with manganese, indicating that the metal is providing this protective effect. Furthermore, this suggests that FetAB does not facilitate manganese transport as tolerance was increased in the knockouts when manganese was present.

The data presented in this study shows that FetAB transports iron. However, iron importers have been shown to also facilitate manganese import, such as a SitABCD homologue in *E. coli* (7) and the *Streptococcus pyogenes* MtsABC transporter (3). We investigated the effects of manganese (Fig. S5A & B) and iron (Fig. 4 A & B) individually, and show that iron is the substrate of FetAB. We also investigated the effects of both metals (Fig. S5 C & D), to determine if the beneficial effect of manganese can counteract the detrimental effect of iron when coupled with H<sub>2</sub>O<sub>2</sub> stress. As shown in Fig. S5C, iron is more detrimental to the  $\Delta fetA$  and  $\Delta fetB$  strains compared to the WT strain, even when manganese is present. This is in agreement with our earlier data, where iron (with no manganese) was shown to be more detrimental to the knockout strains. Manganese cannot abolish the extra ROS species created from the iron, but does provide some protective effect against H<sub>2</sub>O<sub>2</sub> stress. Thus, the FetAB transporter does not appear to have a role in manganese transport, but clearly has a role in iron export.

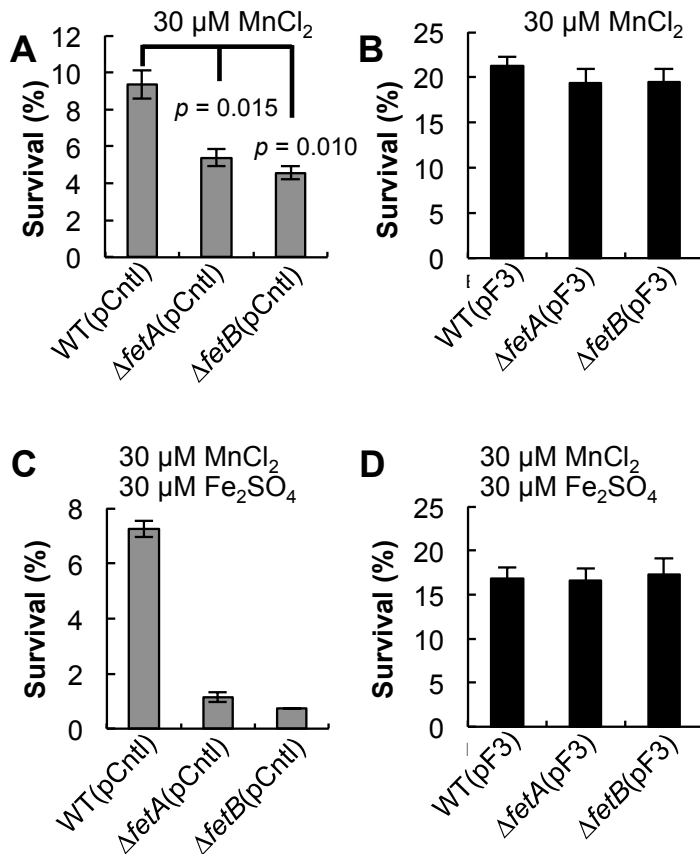

**Fig. S5.** Survival under  $\text{H}_2\text{O}_2$  stress in M9 minimal media with 30  $\mu\text{M}$   $\text{MnCl}_2$  or 30  $\mu\text{M}$   $\text{MnCl}_2$  and 30  $\mu\text{M}$   $\text{FeSO}_4$ . (A) Survival rates of *E. coli* BW25113 (WT),  $\Delta\text{fetA}$  and  $\Delta\text{fetB}$  strains with a control plasmid (pCntl) after a 30 minute exposure to 4 mM  $\text{H}_2\text{O}_2$  at 37  $^\circ\text{C}$  in M9 minimal media with 30  $\mu\text{M}$   $\text{MnCl}_2$ .  $p$ -values indicate the statistical significance of a Student's t-test performed between the WT and the KO strains. (B) Survival rates of *E. coli* BW25113 (WT),  $\Delta\text{fetA}$  and  $\Delta\text{fetB}$  strains with plasmid pF3 (*fetA* and *fetB* overexpression) after a 30 minute exposure to 4 mM  $\text{H}_2\text{O}_2$  at 37  $^\circ\text{C}$  in M9 minimal media with 30  $\mu\text{M}$   $\text{MnCl}_2$ . (C) Survival rates of *E. coli* BW25113 (WT),  $\Delta\text{fetA}$  and  $\Delta\text{fetB}$  strains with a control plasmid after a 30 minute exposure to 4 mM  $\text{H}_2\text{O}_2$  at 37  $^\circ\text{C}$  in M9 minimal media with 30  $\mu\text{M}$   $\text{MnCl}_2$  and 30  $\mu\text{M}$   $\text{FeSO}_4$ . The  $p$ -values between the WT and KO strains are less than 0.001. (D) Survival rates of *E. coli* BW25113 (WT),  $\Delta\text{fetA}$  and  $\Delta\text{fetB}$  strains with plasmid pF3 (*fetA* and *fetB* overexpression) after a 30 minute

exposure to 4 mM H<sub>2</sub>O<sub>2</sub> at 37 °C in M9 minimal media with 30 μM MnCl<sub>2</sub> and 30 μM FeSO<sub>4</sub>. For (A) – (D), the means of three biological experiments, each with three technical replicates are shown, with error bars indicating the SEM.



## References

1. **Altschul, S. F., T. L. Madden, A. A. Schaffer, J. H. Zhang, Z. Zhang, W. Miller, and D. J. Lipman.** 1997. Gapped BLAST and PSI-BLAST: a new generation of protein database search programs. *Nucleic Acids Res* **25**:3389-3402.
2. **Goujon, M., H. McWilliam, W. Z. Li, F. Valentin, S. Squizzato, J. Paern, and R. Lopez.** 2010. A new bioinformatics analysis tools framework at EMBL-EBI. *Nucleic Acids Res* **38**:W695-W699.
3. **Janulczyk, R., S. Ricci, and L. Bjorck.** 2003. MtsABC is important for manganese and iron transport, oxidative stress resistance, and virulence of *Streptococcus pyogenes*. *Infect Immun* **71**:2656-2664.
4. **Krogh, A., B. Larsson, G. von Heijne, and E. L. L. Sonnhammer.** 2001. Predicting transmembrane protein topology with a hidden Markov model: Application to complete genomes. *J Mol Biol* **305**:567-580.
5. **Larkin, M. A., G. Blackshields, N. P. Brown, R. Chenna, P. A. McGettigan, H. McWilliam, F. Valentin, I. M. Wallace, A. Wilm, R. Lopez, J. D. Thompson, T. J. Gibson, and D. G. Higgins.** 2007. Clustal W and Clustal X version 2.0. *Bioinformatics* **23**:2947-2948.
6. **Marchler-Bauer, A., S. N. Lu, J. B. Anderson, F. Chitsaz, M. K. Derbyshire, C. DeWeese-Scott, J. H. Fong, L. Y. Geer, R. C. Geer, N. R. Gonzales, M. Gwadz, D. I. Hurwitz, J. D. Jackson, Z. X. Ke, C. J. Lanczycki, F. Lu, G. H. Marchler, M. Mullokandov, M. V. Omelchenko, C. L. Robertson, J. S. Song, N. Thanki, R. A. Yamashita, D. C. Zhang, N. G. Zhang, C. J. Zheng, and S. H.**

- Bryant.** 2011. CDD: a Conserved Domain Database for the functional annotation of proteins. *Nucleic Acids Res* **39**:D225-D229.
7. **Sabri, M., S. Leveille, and C. M. Dozois.** 2006. A SitABCD homologue from an avian pathogenic *Escherichia coli* strain mediates transport of iron and manganese and resistance to hydrogen peroxide. *Microbiol-Sgm* **152**:745-758.
